# Supplementary material for: Colloidal Quantum Nanostructures: Emerging Materials for Display Applications
Source: PubMed Central journal article supplement — Angew Chem Int Ed Engl. 2018 Feb 27;57(16):4274–95. doi: 10.1002/anie.201708510 (PMC6001641; doi:10.1002/anie.201708510), 2018-02-27
Supplement: ANIE-57-4274-s001.pdf [file ANIE-57-4274-s001.pdf]

## **Author Contributions**

Y.P. Writing – original draft: Equal; Writing – review & editing: Equal  
M.O. Writing – original draft: Equal; Writing – review & editing: Equal  
U.B. Writing – original draft: Equal; Writing – review & editing: Equal.
